# Supplementary material for: Atomistic understanding of structural evolution, ion transport and oxygen stability in layered NaFeO2
Source: Royal Society of Chemistry journal article supplement (doi:10.1039/c8ta10767j), 2019-01-01
Supplement: c8ta10767j1.pdf [file c8ta10767j1.pdf]

Electronic Supplementary Information for

**Atomistic understanding of structural evolution, ion transport and oxygen stability in  
layered NaFeO<sub>2</sub>**

Yurui Gao,<sup>a</sup> Zhaoxiang Wang<sup>b,c</sup> and Gang Lu<sup>\*a</sup>

<sup>a</sup>*Department of Physics and Astronomy, California State University Northridge, Northridge, California 91330-8268, USA. \*E-mail: ganglu@csun.edu.*

<sup>b</sup>*Key Laboratory for Renewable Energy, Chinese Academy of Sciences, Beijing Key Laboratory for New Energy Materials and Devices, Institute of Physics, Chinese Academy of Sciences, Beijing 100190, China.*

<sup>c</sup>*School of Physical Sciences, University of Chinese Academy of Sciences, Beijing 100190, China.*

**Table 1S.** The lattice parameters of Na<sub>x</sub>FeO<sub>2</sub> ( $x = 1, 0.67, 0.5$  and  $0.33$ ) and the average thickness of FeO<sub>6</sub> (d1) and NaO<sub>6</sub> slabs (d2), unit spacing (d), and bond distance of Fe-O (d<sub>Fe-O</sub>) in them.

|                          | <i>x</i> | <i>a</i> | <i>b</i> | <i>c</i> | $\alpha$ | $\beta$ | $\gamma$ | d1   | d2   | d    | d <sub>Fe-O</sub> |
|--------------------------|----------|----------|----------|----------|----------|---------|----------|------|------|------|-------------------|
| <b>Expt.<sup>a</sup></b> | 1        | 3.03     | 3.03     | 16.10    | 90       | 90      | 120      |      |      |      |                   |
|                          | 0.36     | 5.27     | 2.90     | 5.92     | 90       |         | 90       |      |      |      |                   |
| <b>Calc.<sup>b</sup></b> | 1        | 3.04     | 3.04     | 16.10    | 90       | 90      | 120      | 2.18 | 3.18 | 5.37 | 2.07              |
|                          | 0.67     | 2.99     | 2.99     | 16.57    | 90       | 90      | 120      | 2.12 | 3.40 | 5.52 | 2.03              |
|                          | 0.5      | 5.23     | 2.94     | 5.94     | 90       | 108     | 90       | 2.08 | 3.58 | 5.65 | 2.00              |
|                          | 0.33     | 5.19     | 2.94     | 5.99     | 90       | 107     | 90       | 2.03 | 3.71 | 5.74 | 1.98              |

Note: <sup>a</sup> data from reference 1; <sup>b</sup> data calculated in this work.

**Table 2S.** The energy barriers for Na hop in NaFeO<sub>2</sub> with different in-plane and out-of-plane (*c*-direction) strains.

| strain               | +6.25% | +5%   | +3%   | +1%   | 0     | -1%   | -3%   | -5%   | -6.25% |
|----------------------|--------|-------|-------|-------|-------|-------|-------|-------|--------|
| Ea( <i>ab</i> ) / eV | ---    | 0.175 | 0.182 | 0.202 | 0.209 | 0.214 | 0.232 | 0.252 | ---    |
| Ea( <i>c</i> ) / eV  | 0      | 0.013 | 0.062 | 0.156 | 0.209 | 0.269 | 0.400 | 0.580 | 0.709  |

The energy of  $\text{Na}_x\text{FeO}_2$  ( $x = 1, 0.67, 0.5$  and  $0.33$ ) with O1, O2 and O3 stacking, where O3 stacking further includes the C2/m and  $\text{R}\bar{3}\text{m}$  structure, are calculated. The results are shown by solid black line with solid squares in Figure 1S, indicating that the O3 stacking  $\text{Na}_x\text{FeO}_2$  has the lowest energy in the range of  $0.33 \leq x \leq 1$ . Therefore, the O3 stacking  $\text{Na}_x\text{FeO}_2$  tend not to transit into the O1 nor O2 even when as much as 0.67 Na ions removed. Moreover, for  $x = 1$  and 0.67, the  $\text{R}\bar{3}\text{m}$  structured  $\text{Na}_x\text{FeO}_2$  is energetically more stable than the C2/m structured, while the latter is energetically more stable than the former when  $x = 0.5$  and 0.33, consistent with the experimental results and confirming the rationalization of our models. When biaxial strain within 0.03 or uniaxial strain within 0.05 is applied, the O3 stacking  $\text{Na}_x\text{FeO}_2$  still has lower energy than the O1 and O2 stacking  $\text{Na}_x\text{FeO}_2$ , although the C2/m structured  $\text{Na}_x\text{FeO}_2$  may display slight lower energy than the  $\text{R}\bar{3}\text{m}$  structured when  $x = 1$  and 0.67 or the  $\text{R}\bar{3}\text{m}$  structured  $\text{Na}_x\text{FeO}_2$  may show slight lower energy than the C2/m structured when  $x = 0.5$  and 0.33 at some certain strains. One thing to notice is that the energy difference of  $\text{R}\bar{3}\text{m}$  and C2/m structured  $\text{Na}_x\text{FeO}_2$  at these special strains is in the order of 0.01 eV or smaller, which is about the error of the DFT calculations and negligible compared with the energy change in diffusion barriers and  $\Delta G$  caused by the strains (in the order of 0.1 eV or larger). Moreover, the  $\text{R}\bar{3}\text{m}$  structure (at  $x = 1$  and 0.67) or the C2/m structure (at  $x = 0.5$  and 0.33) can be maintained in most cases when strain applied since the strains applied in this work is rather small. Therefore, we directly applied strains on the  $\text{R}\bar{3}\text{m}$ -structured  $\text{Na}_x\text{FeO}_2$  at  $x = 1, 0.67$  and the C2/m-structured  $\text{Na}_x\text{FeO}_2$  at  $x = 0.5$  and 0.33.

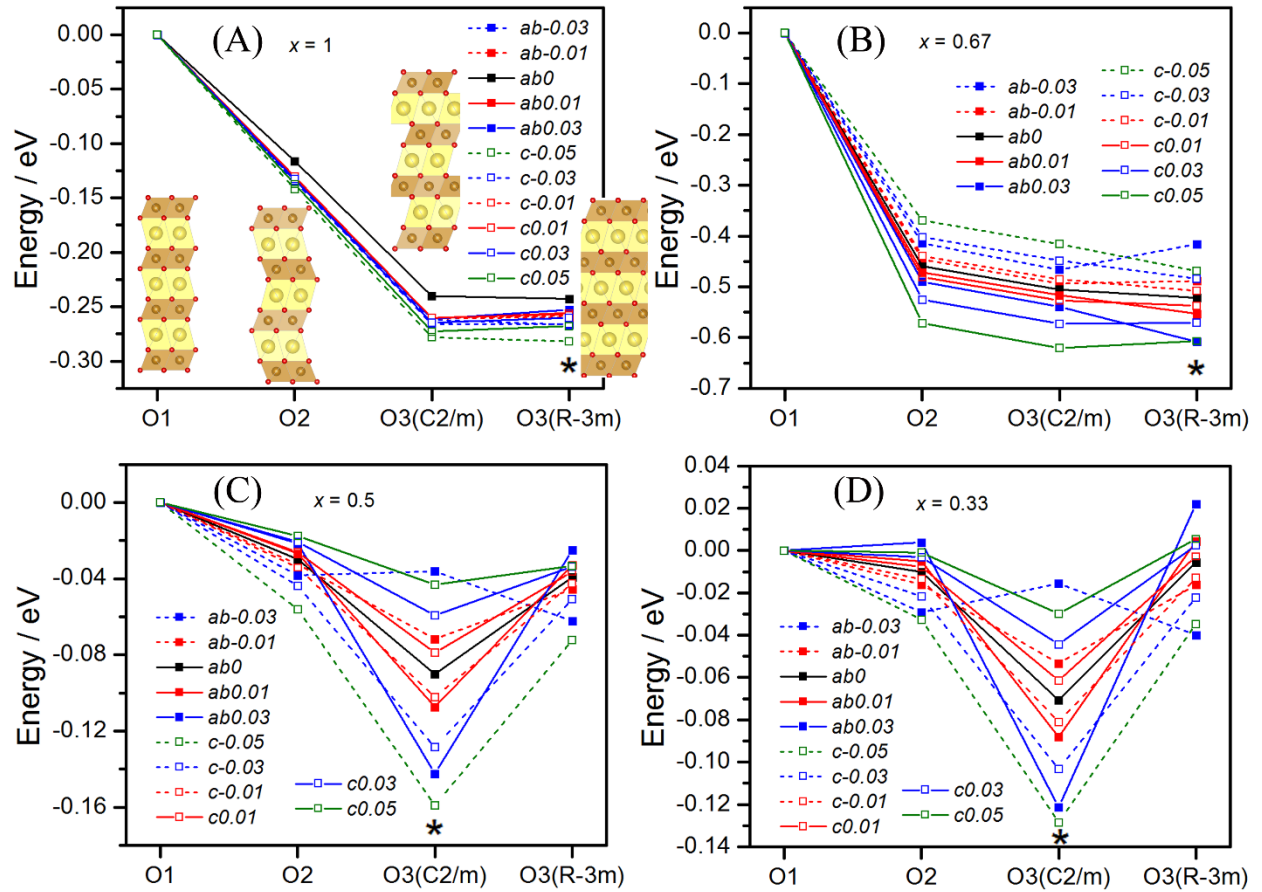

**Figure 1S.** Total energy of  $\text{Na}_x\text{FeO}_2$  in the O1, O2 and O3 (including C2/m and R $\bar{3}$ m) stacking structures under strains (positive for tension and negative for compression in the  $ab$  plane or in the  $c$ -direction) at  $x = 1$  (A), 0.67 (B), 0.5 (C) and 0.33 (D). The energy of  $\text{Na}_x\text{FeO}_2$  with the O1 stacking is set to zero.

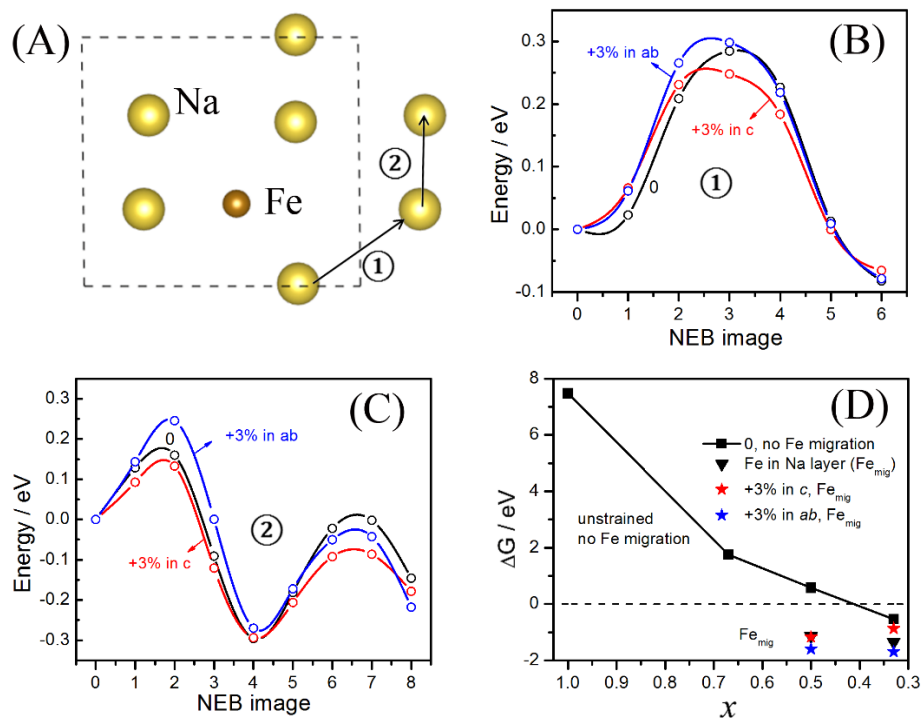

**Figure 2S.** Diffusion energy barriers for Na ion along two continuous pathways (A) after Fe<sup>3+</sup> ion moving into the Na layer with or without strains (B and C for pathway 1 and 2, respectively). Gibbs free energy ( $\Delta G$ ) of O<sub>2</sub> release (D) from Na<sub>0.33</sub>FeO<sub>2</sub> and Na<sub>0.5</sub>FeO<sub>2</sub>, each containing one Fe<sup>3+</sup> at the Na layer without strain (inverted black triangles), with 3% uniaxial tension in *c*-direction (red stars), 3% biaxial tension in the *ab* plane (blue stars).  $\Delta G$  of O<sub>2</sub> release from Na<sub>*x*</sub>FeO<sub>2</sub> ( $x = 1, 0.67, 0.5$  and  $0.33$ ) without strain is shown in black line with squares for comparison.

## References

1. Y. J. Li, Y. R. Gao, X. F. Wang, X. Shen, Q. Y. Kong, R. C. Yu, G. Lu, Z. X. Wang and L. Q. Chen, *Nano Energy*, 2018, **47**, 519.
